# Supplementary material
Source: PubMed Central journal article supplement (PMC3980524)
Supplement: mmc1.pdf [file mmc1.pdf]

The American Journal of Human Genetics, Volume 94

Supplemental Data

**GeMes: Clusters of DNA Methylation  
under Genetic Control Can Inform  
Genetic and Epigenetic Analysis of Disease**

Yun Liu, Xin Li, Martin J. Aryee, Tomas J. Ekström, Leonid Padyukov, Lars Klareskog,  
Amy Vandiver, Ann Zenobia Moore, Toshiko Tanaka, Luigi Ferrucci, M. Daniele Fallin,  
and Andrew P. Feinberg

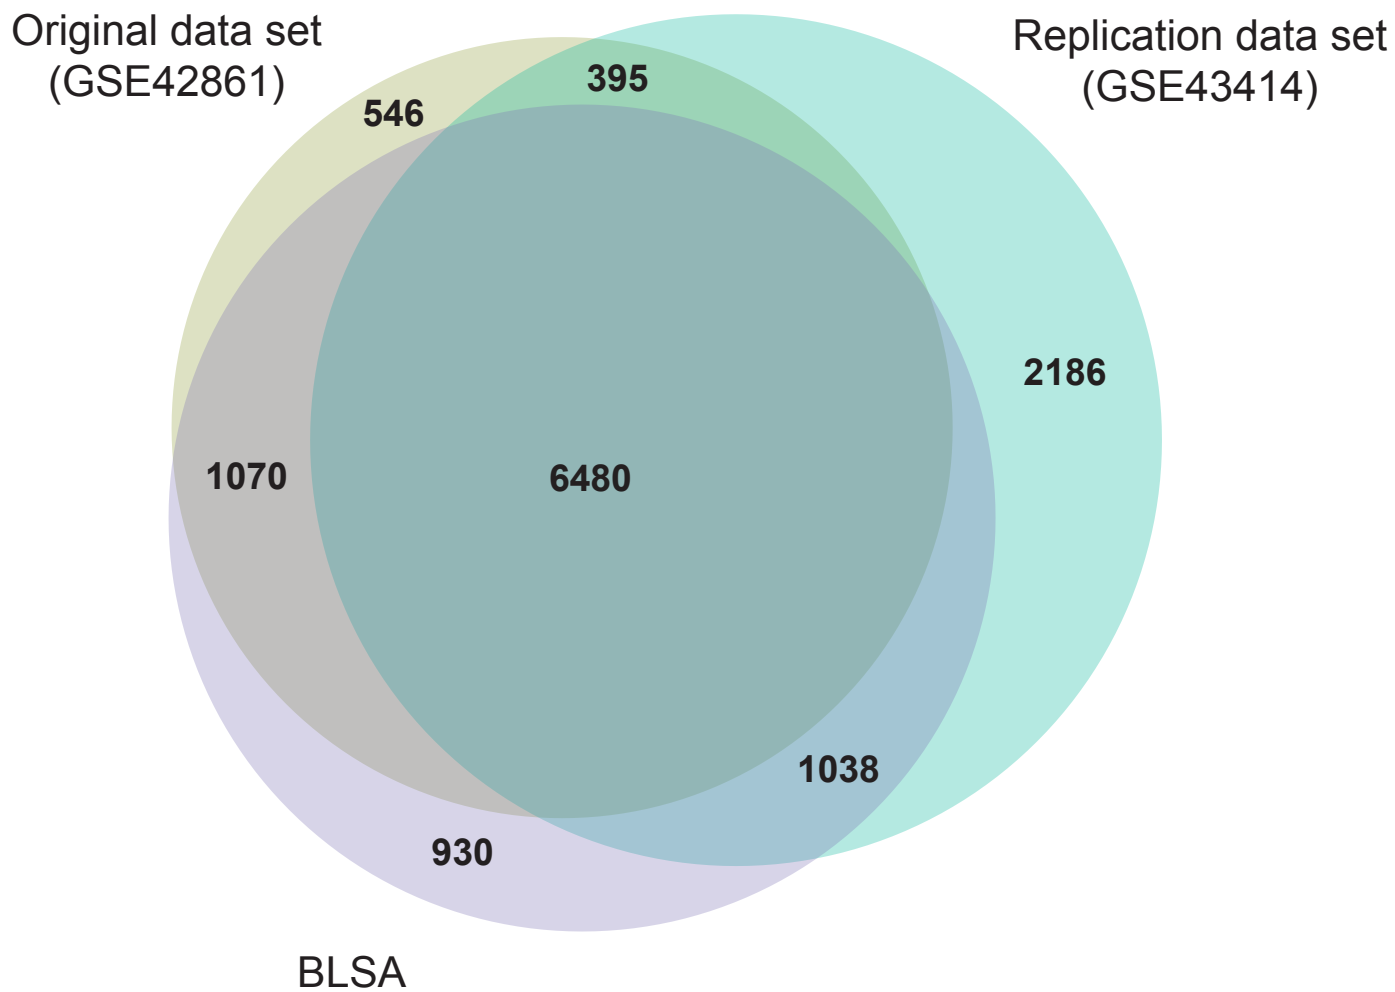

**Figure S1. Venn diagram of contiguous methylation clusters identified from whole blood using three independent data sets.**

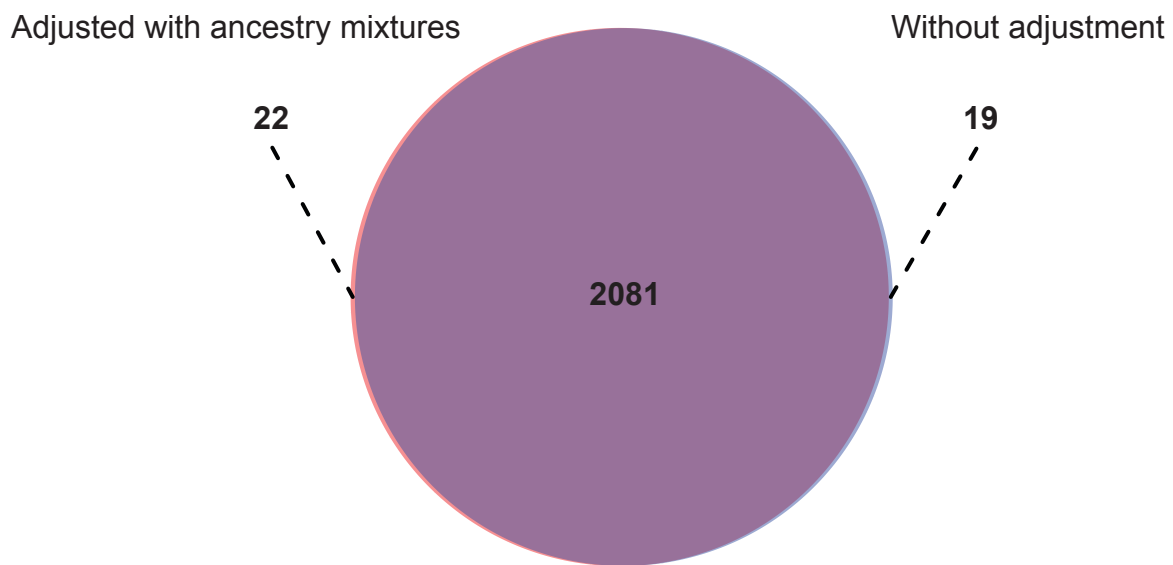

**Figure S2. Venn diagram of contiguous methylation clusters identified from whole blood with or without adjusting for ancestry mixtures.**

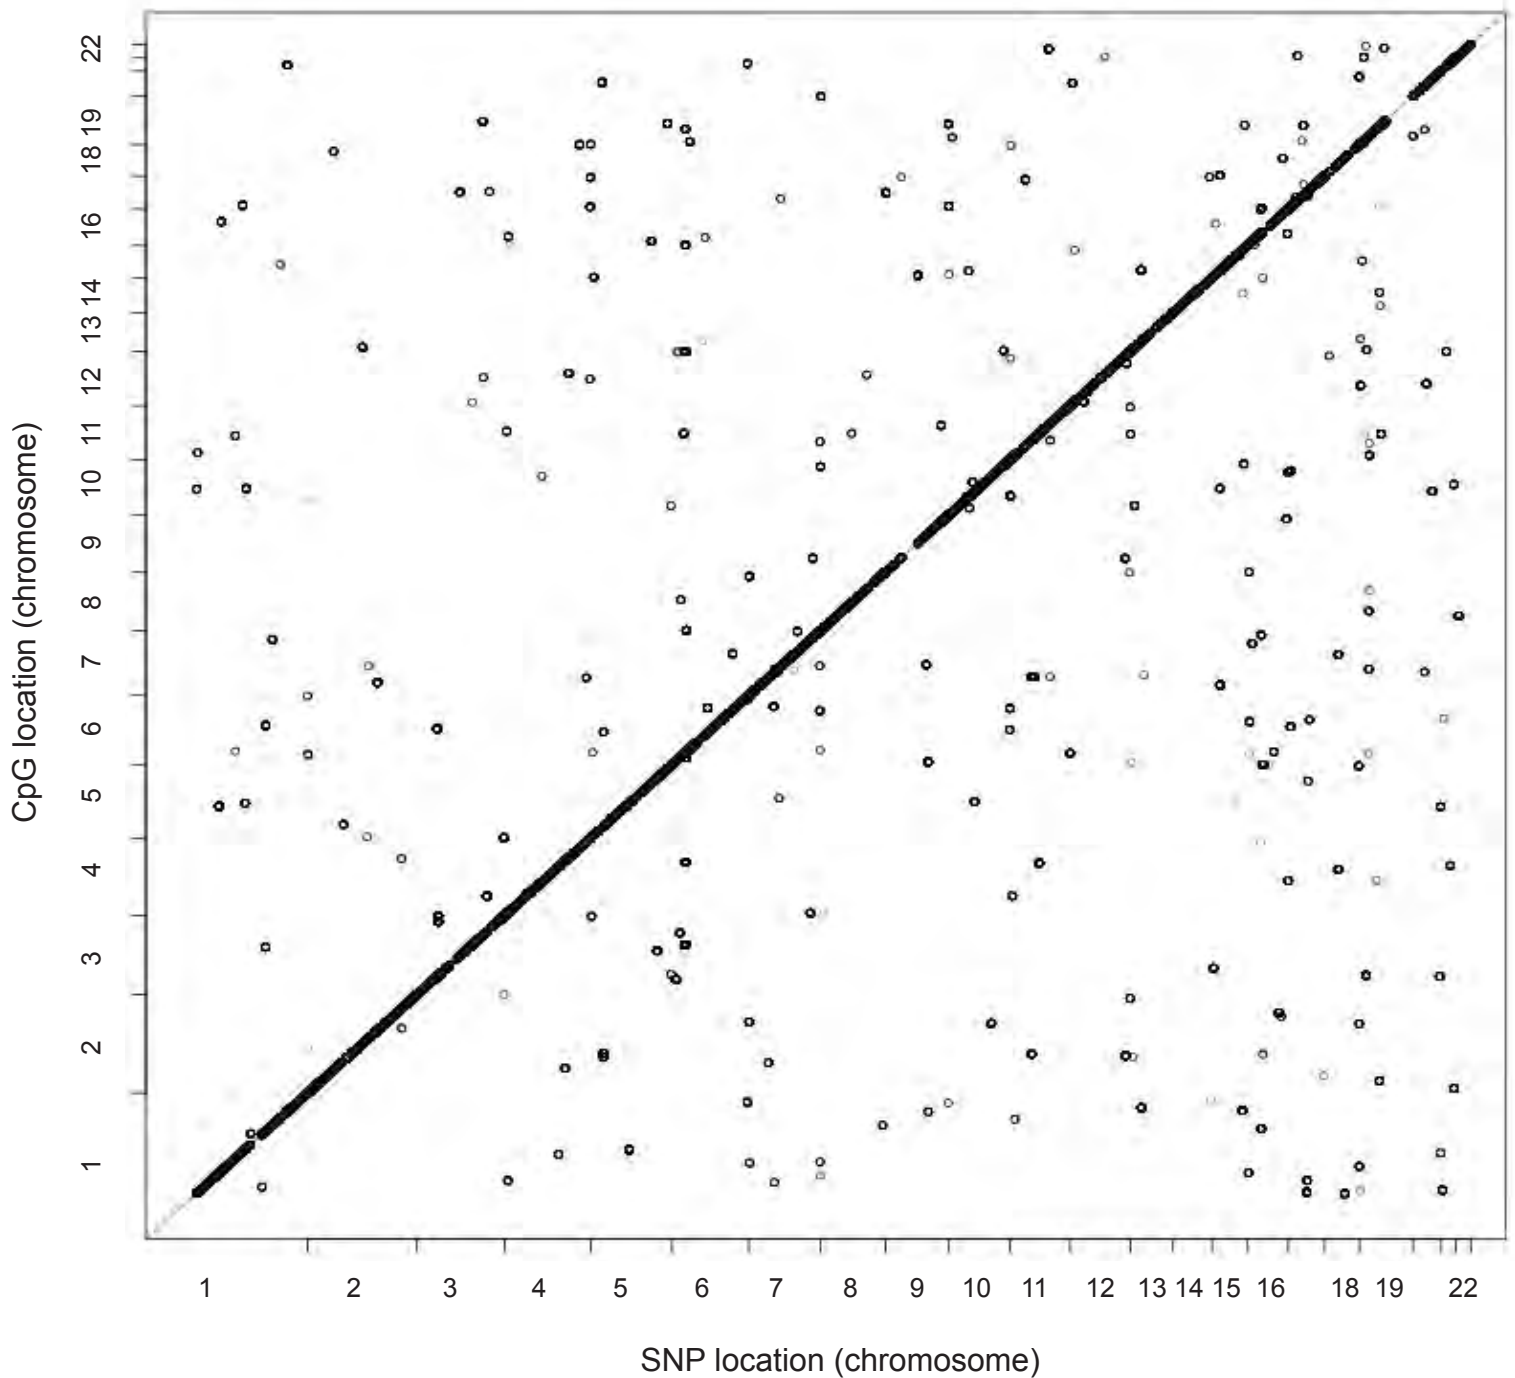

**Figure S3. Distribution of significant vCpGs and SNPs with which they associate.** Each point represents a significant association between a vCpG site and a SNP. The color of the dot indicates significance of the *P* value.

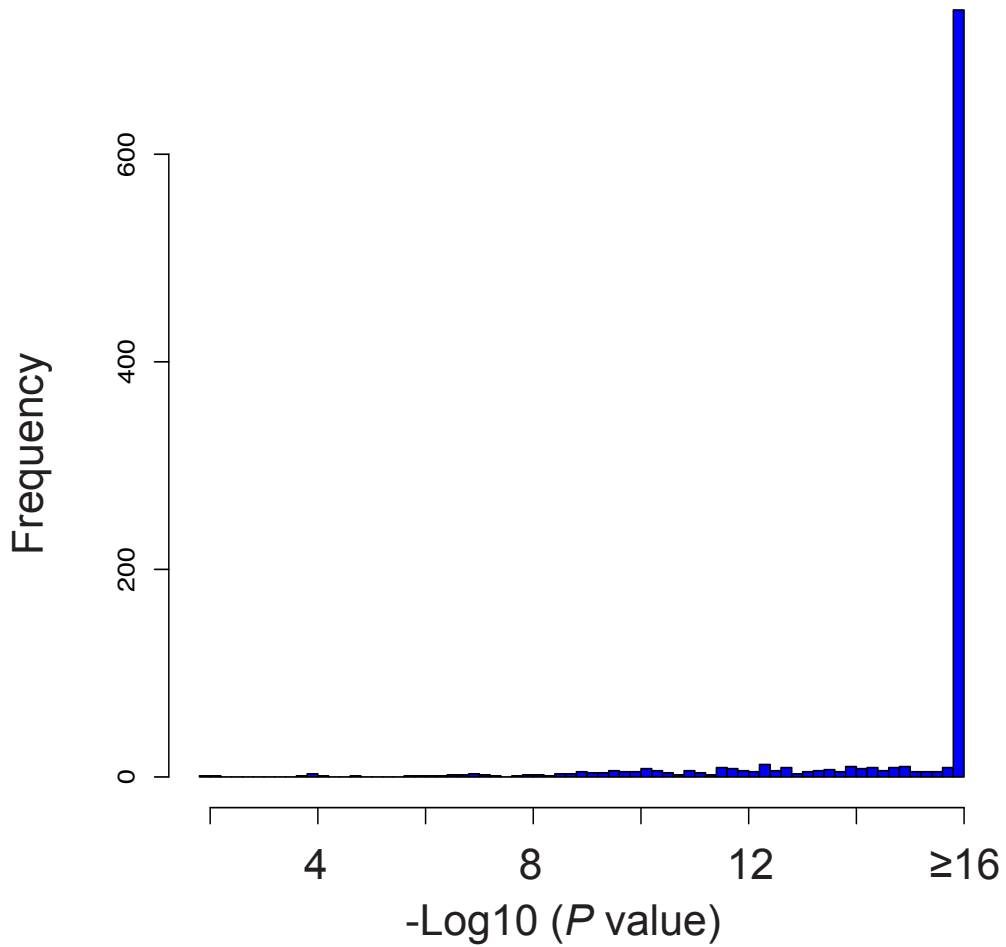

**Figure S4.  $-\log_{10}(P \text{ value})$  distribution of genotype-methylation associations of 991 CpG-SNP pairs tested in the BLSA data set.**

**A**

rs7703051: LDL-cholesterol levels

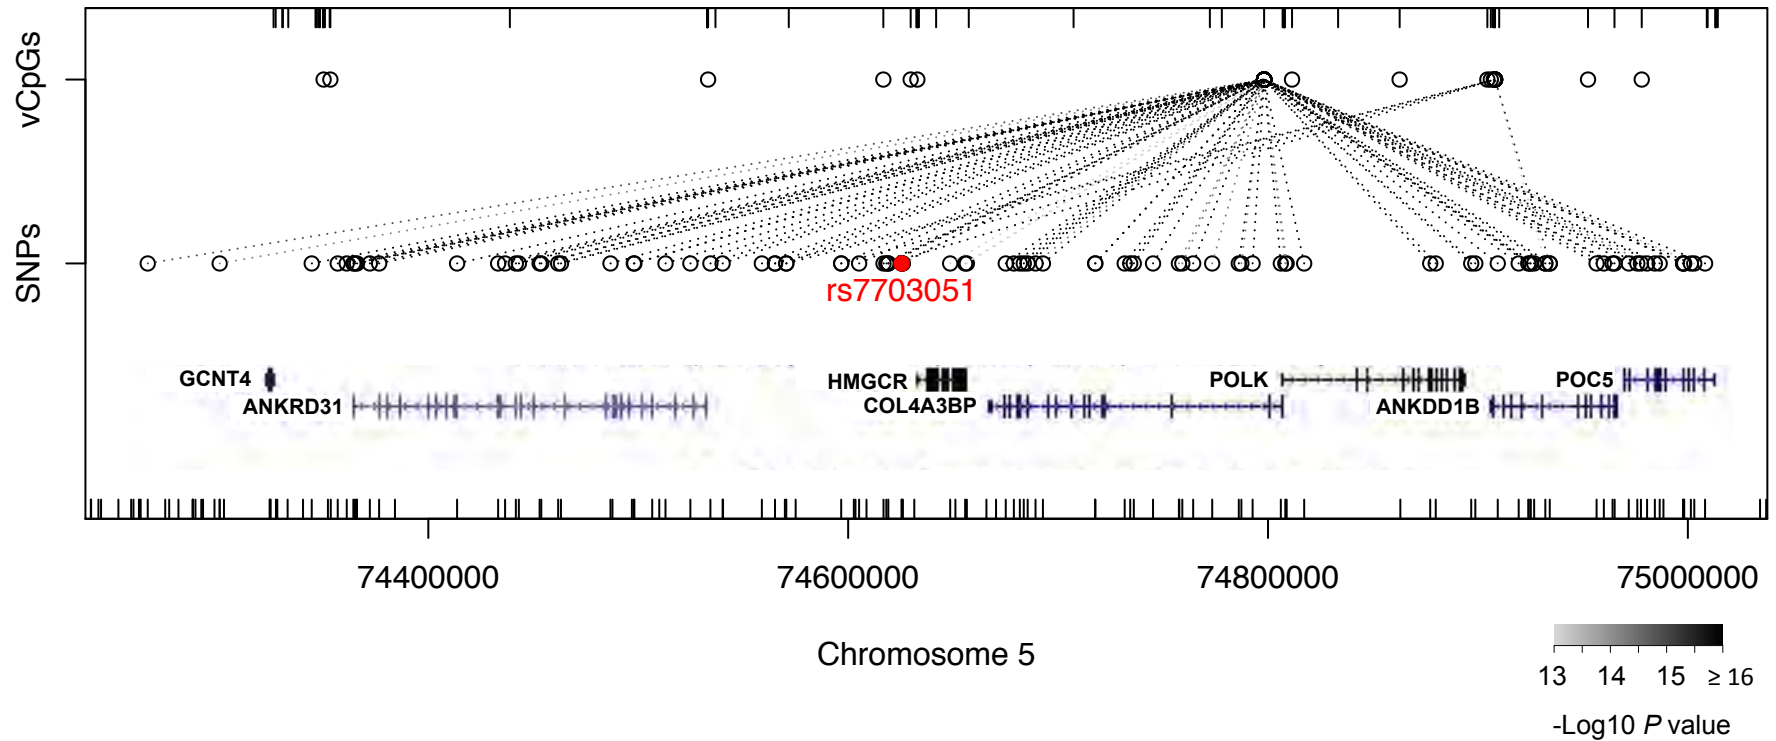

**Figure S5. Some examples in which GWAS variants control DNA methylation at GeMes.**

**B**

rs13129697: serum uric acid concentration

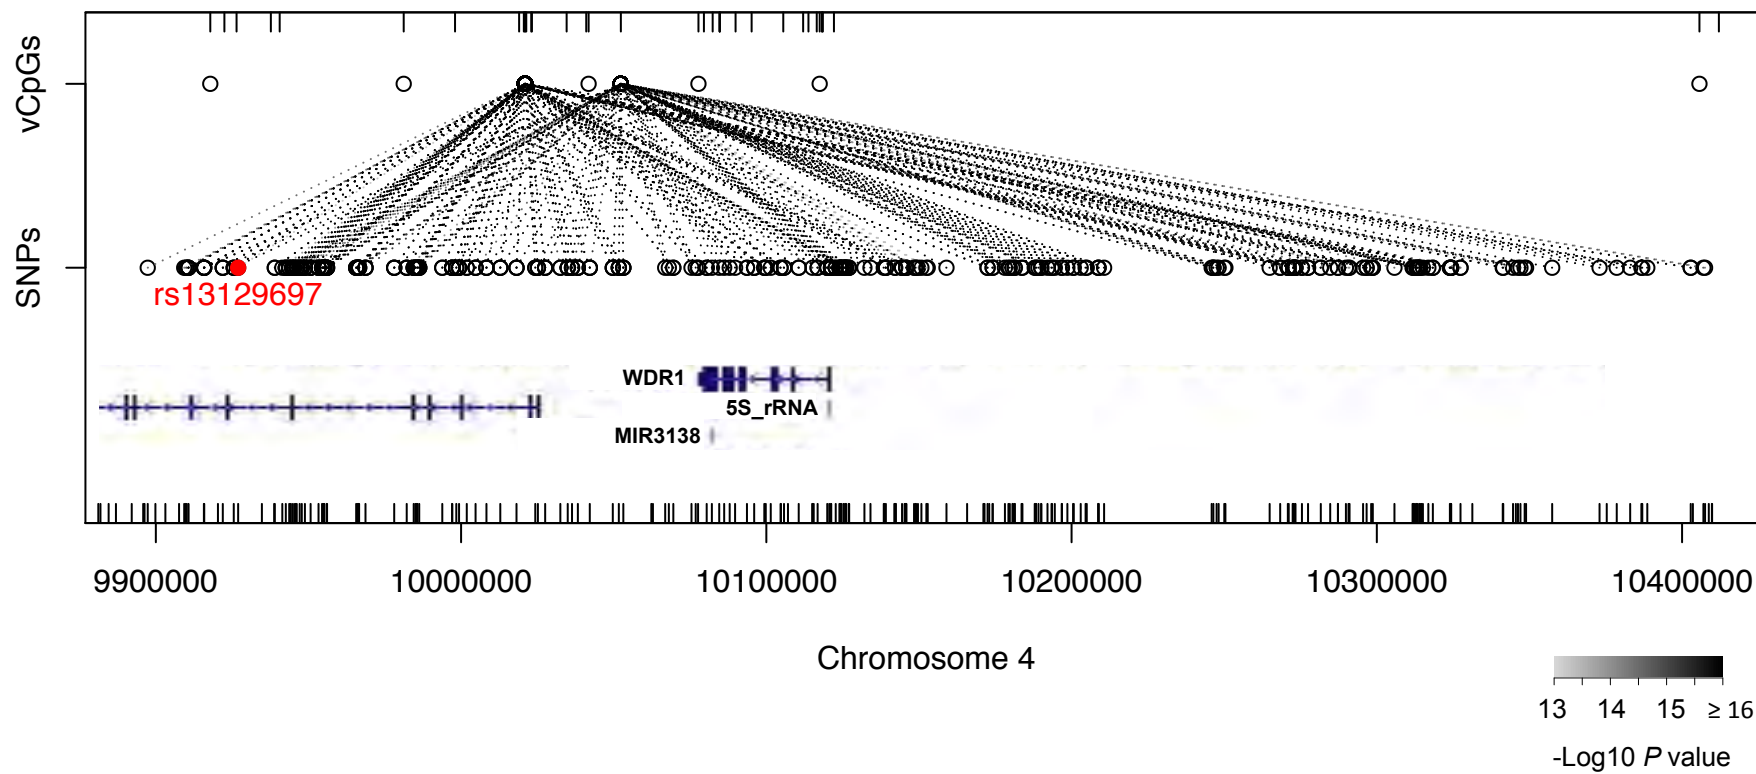

**Figure S5. (continued).**

C

rs780093: metabolic phenotypes

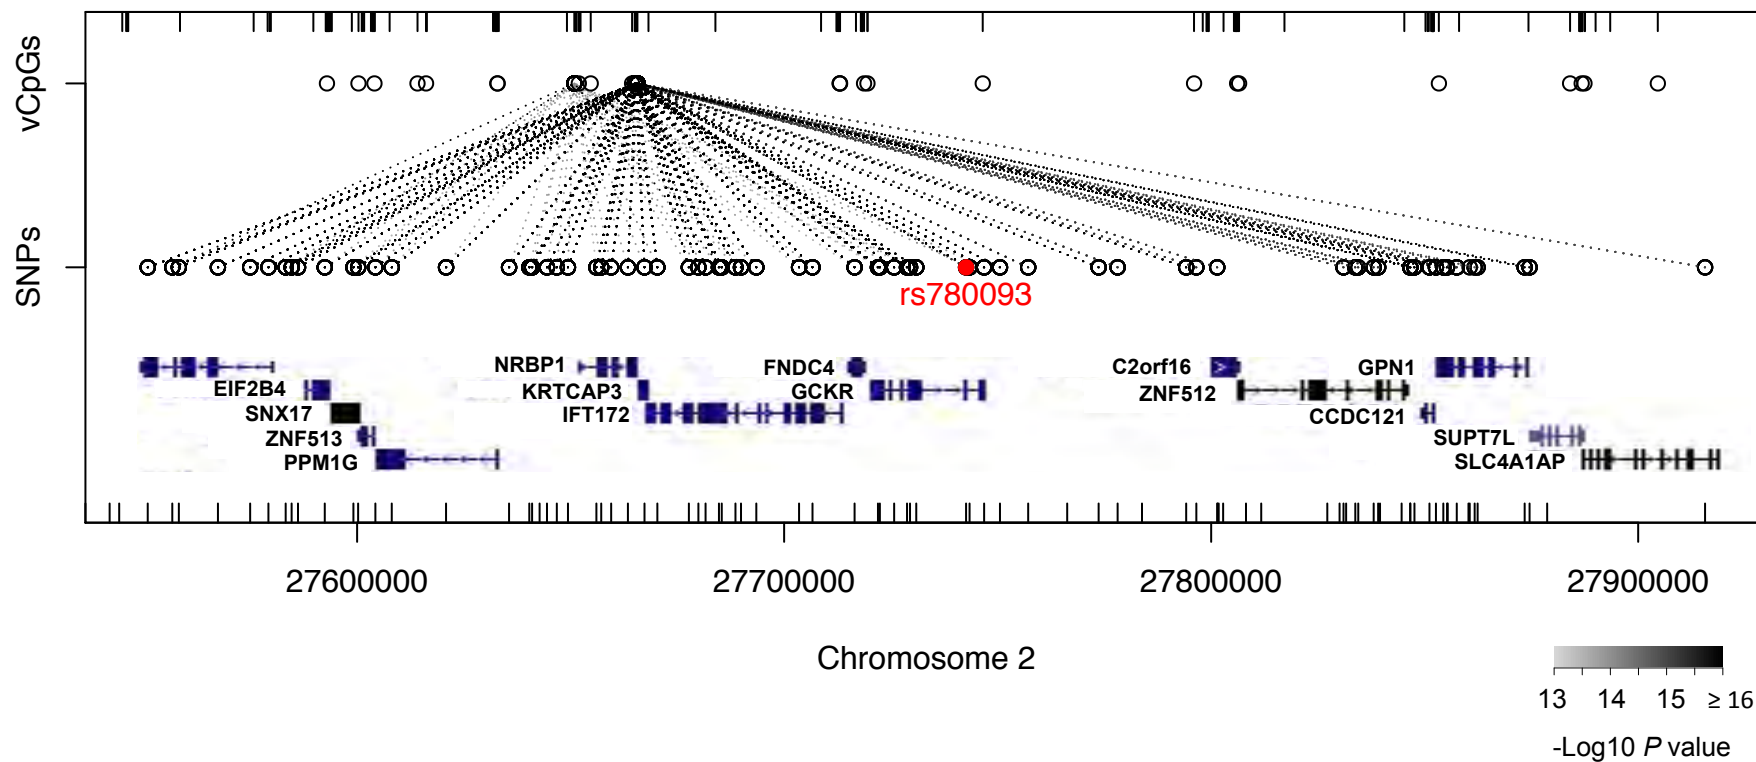

Figure S5. (continued).



**D**

rs3761847: rheumatoid arthritis

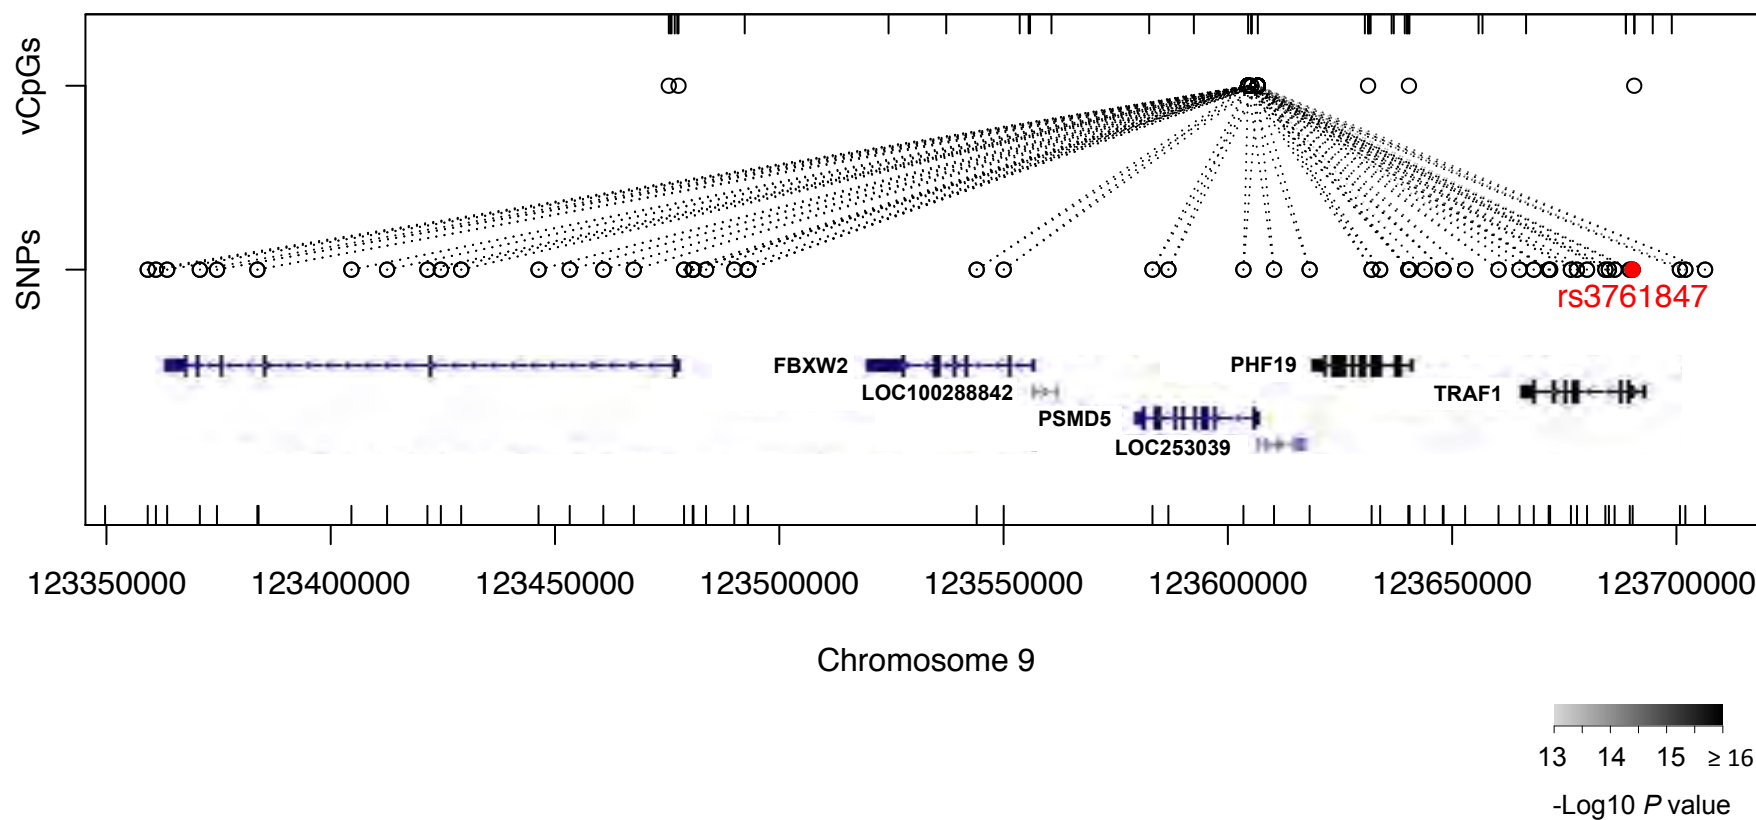

**Figure S5. (continued).**

**E**

rs354033: multiple sclerosis

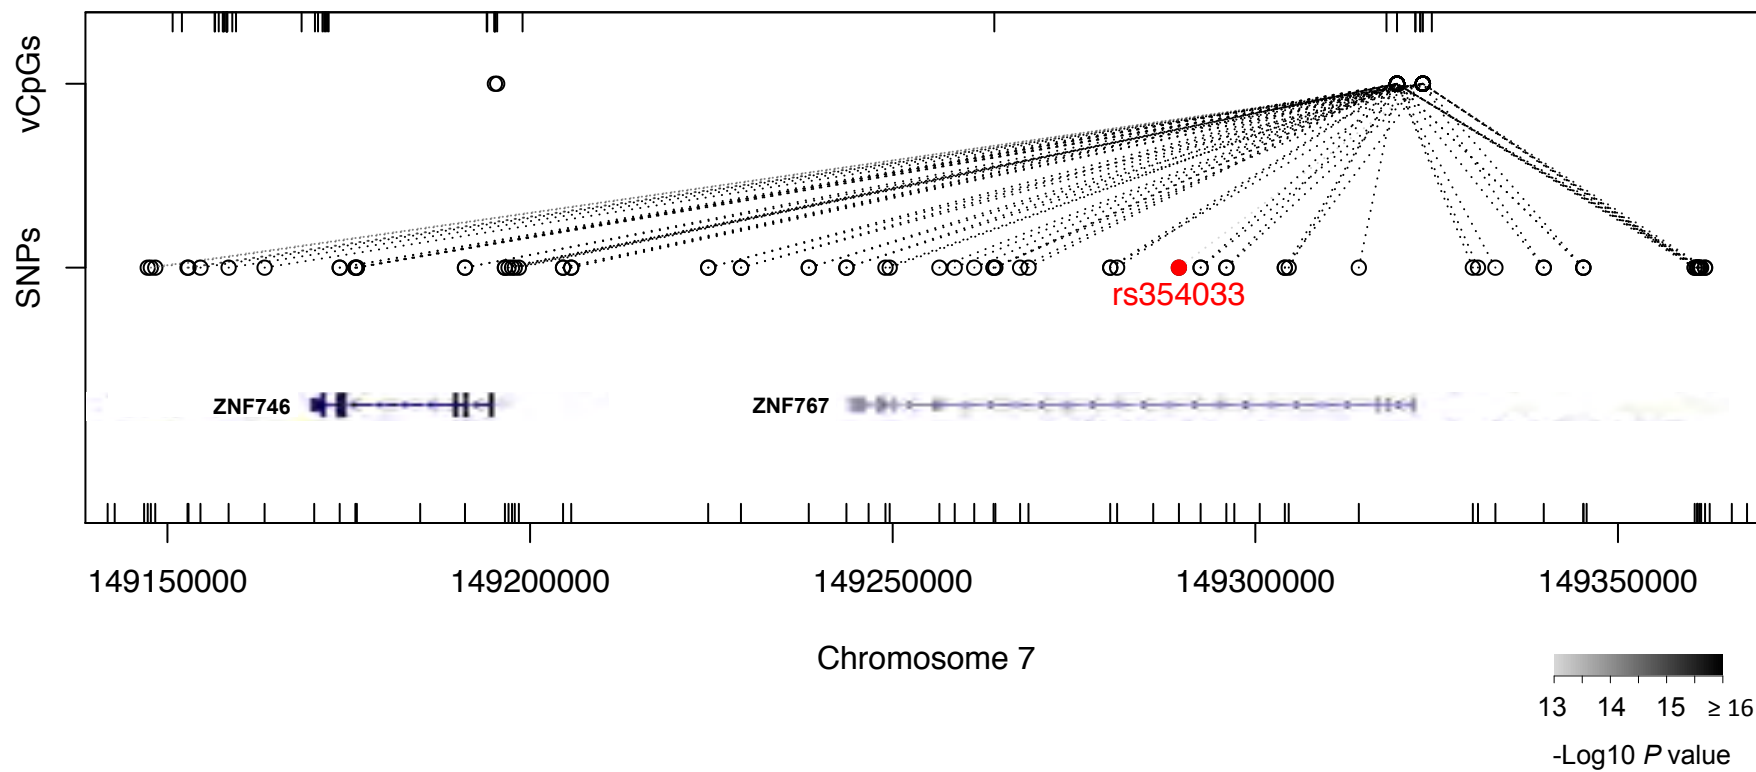

**Figure S5. (continued).**

**F**

rs401681: melanoma, lung cancer, pancreatic cancer, bladder cancer

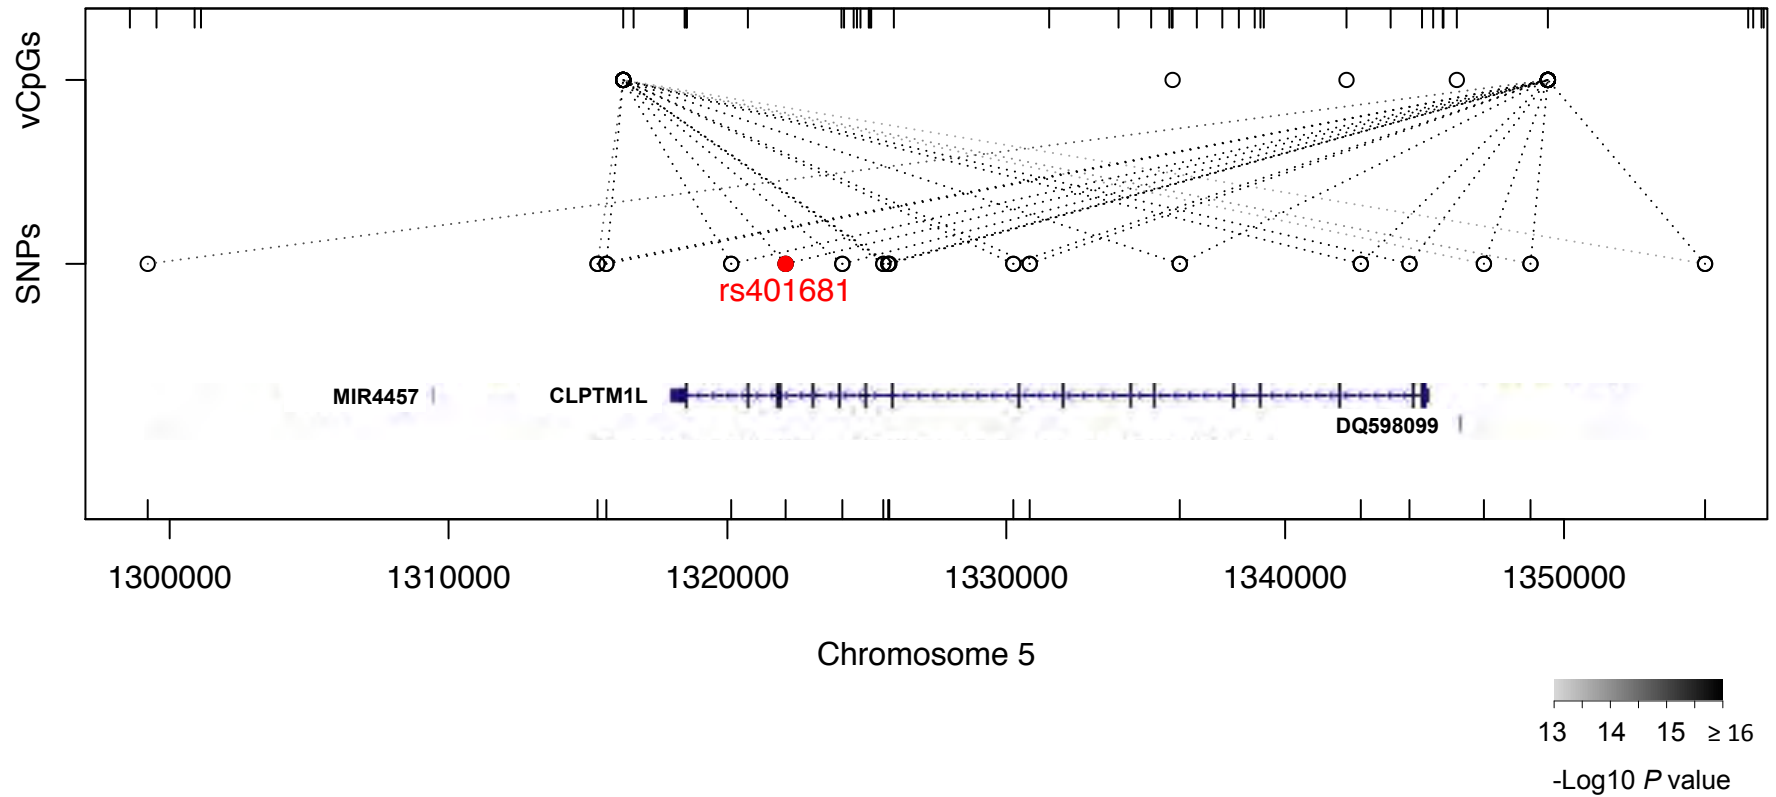

**Figure S5. (continued).**

**G**

rs937254: coronary heart disease

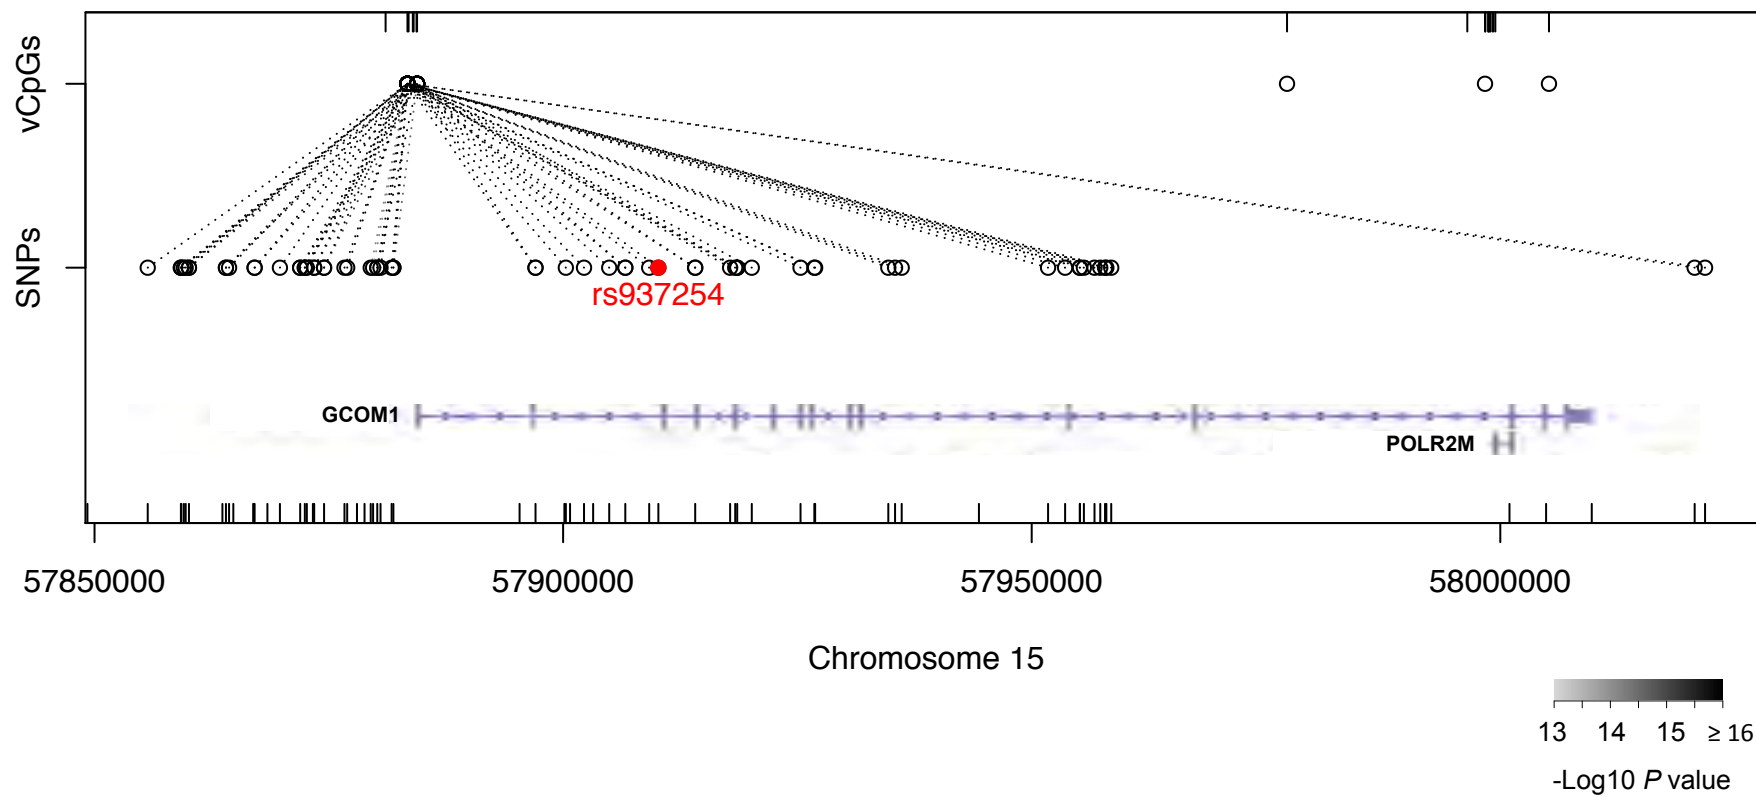

**Figure S5. (continued).**

H

rs3811647: serum iron levels

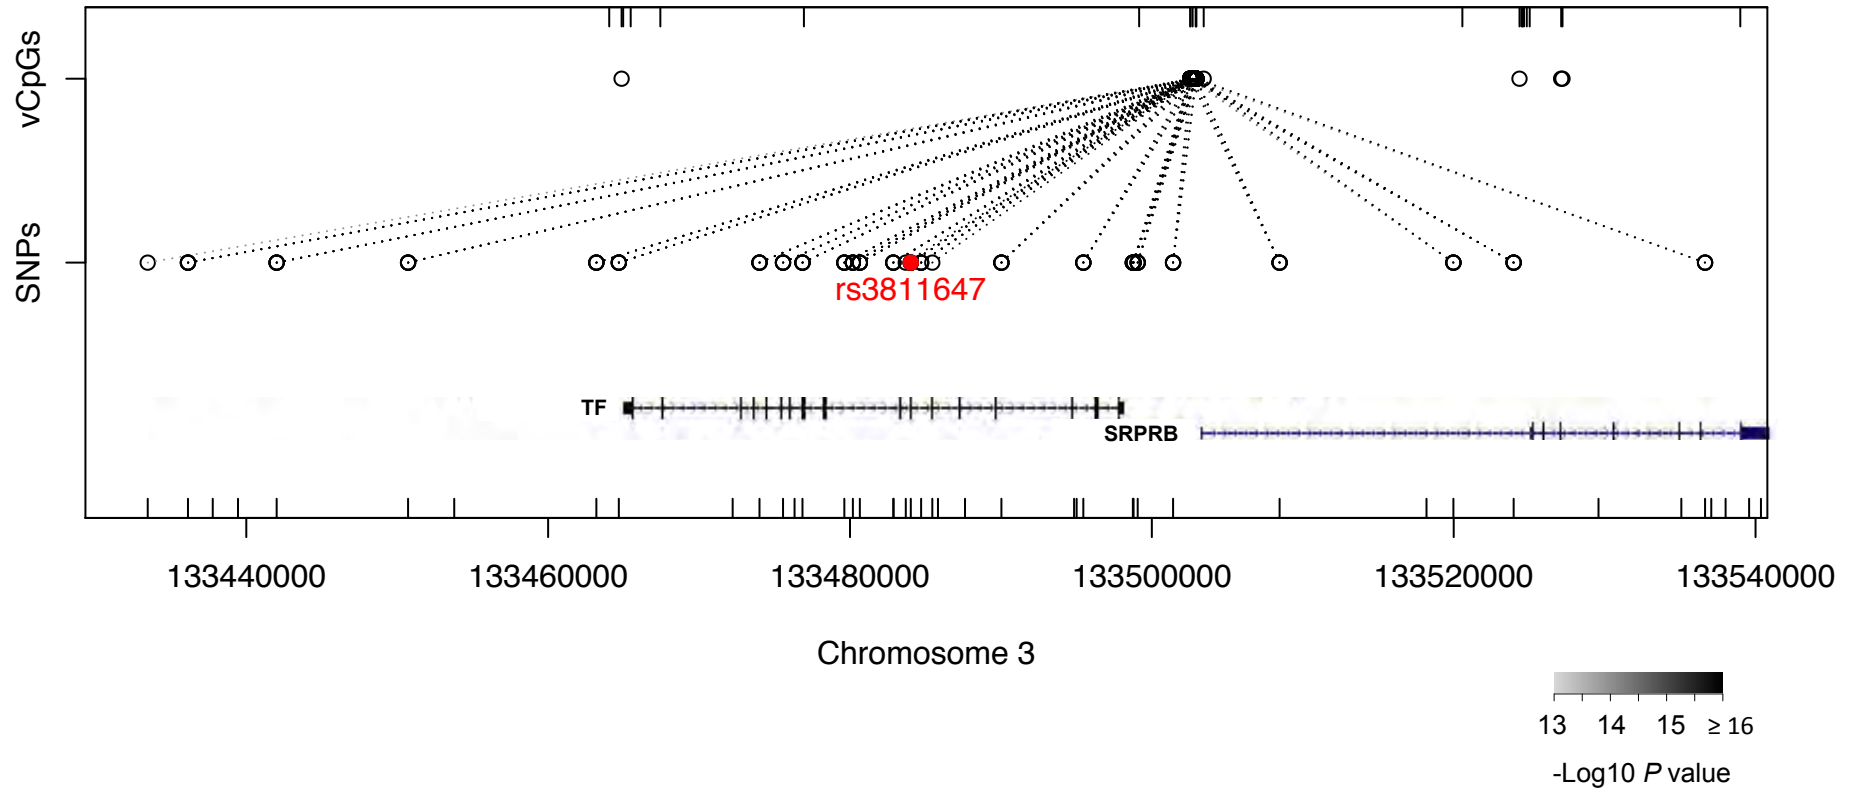

Figure S5. (continued).

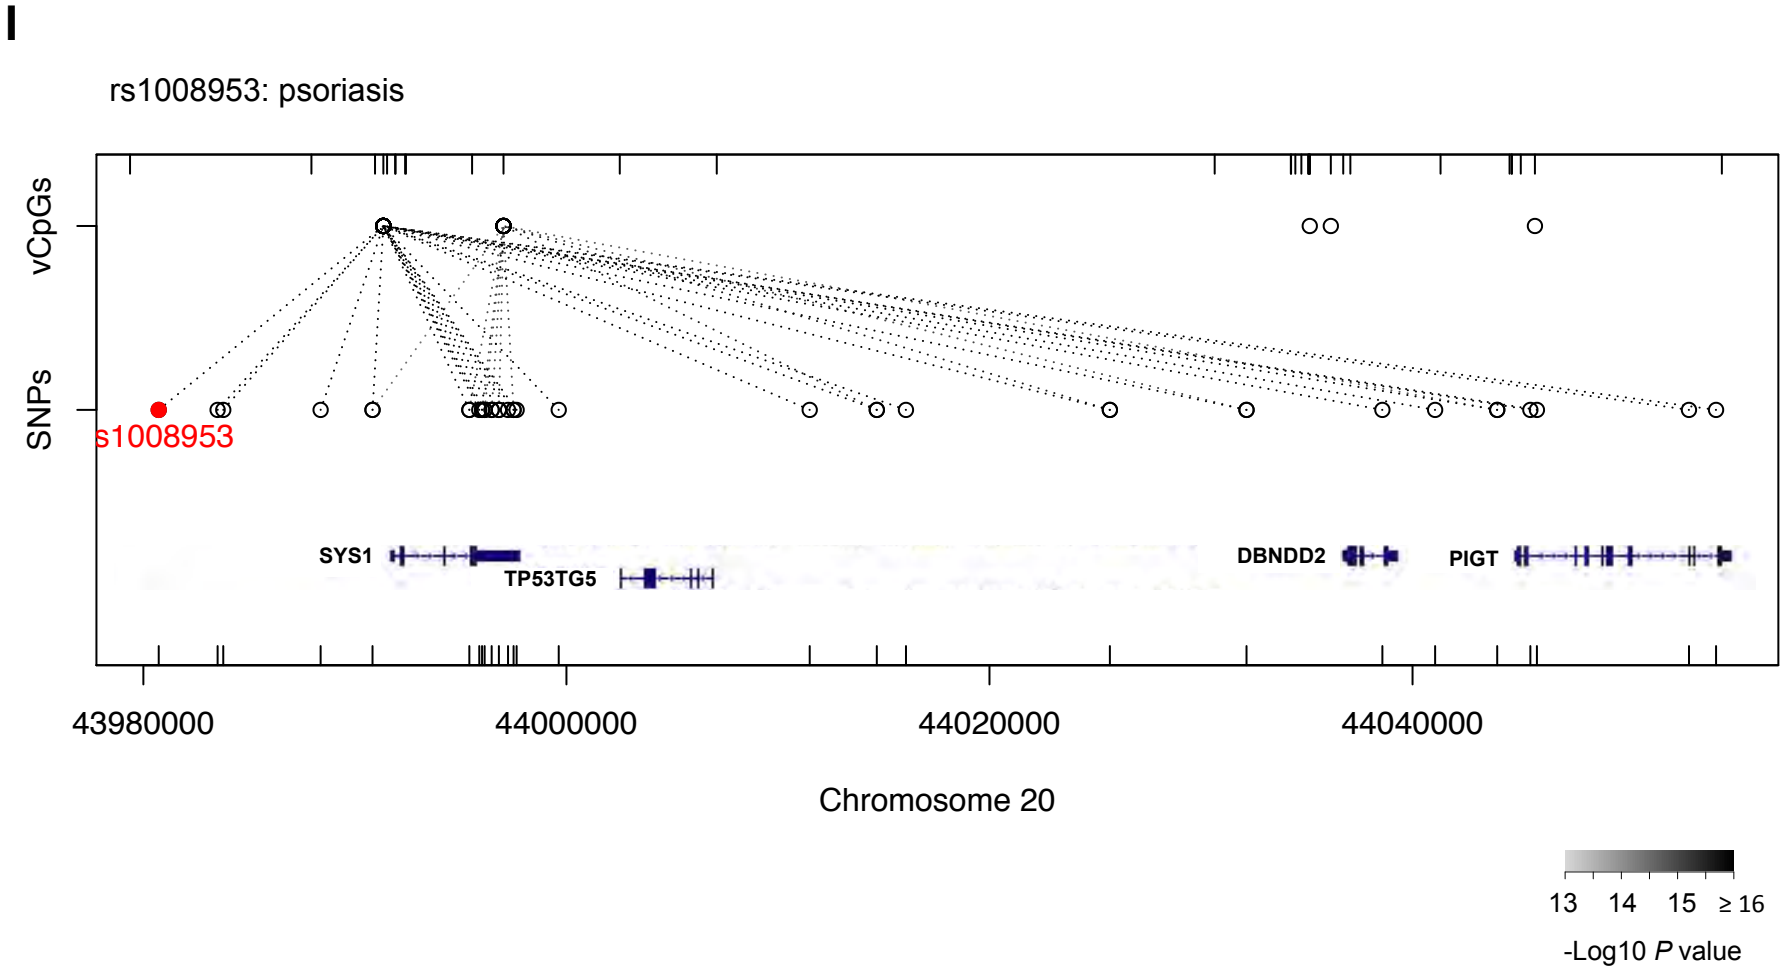

**Figure S5. (continued).**

J

rs11190140: ulcerative colitis

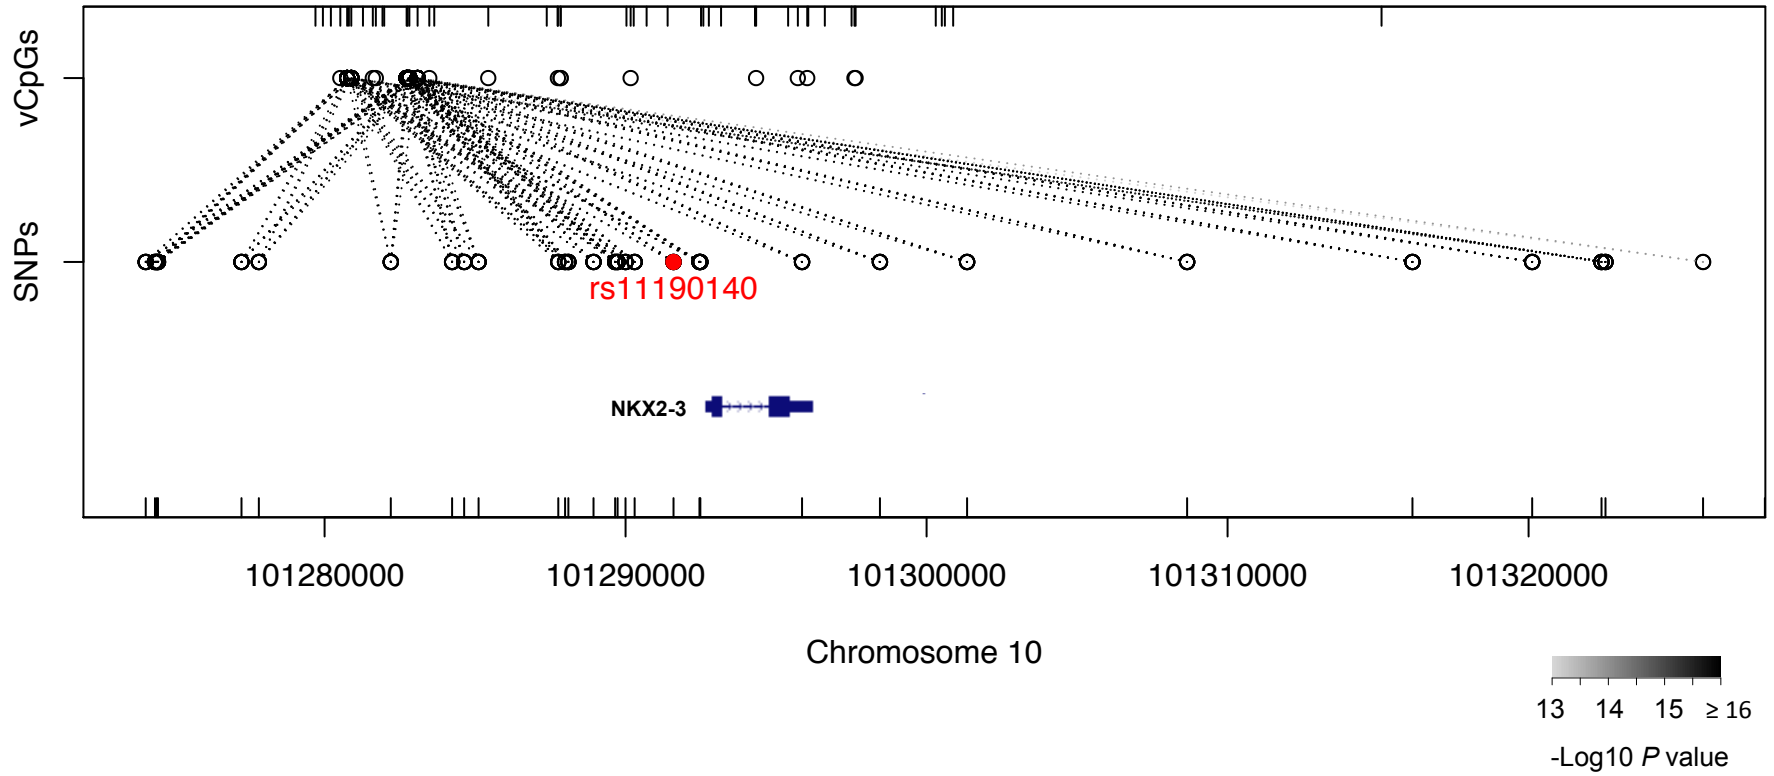

Figure S5. (continued).

**A**

FADS1/2

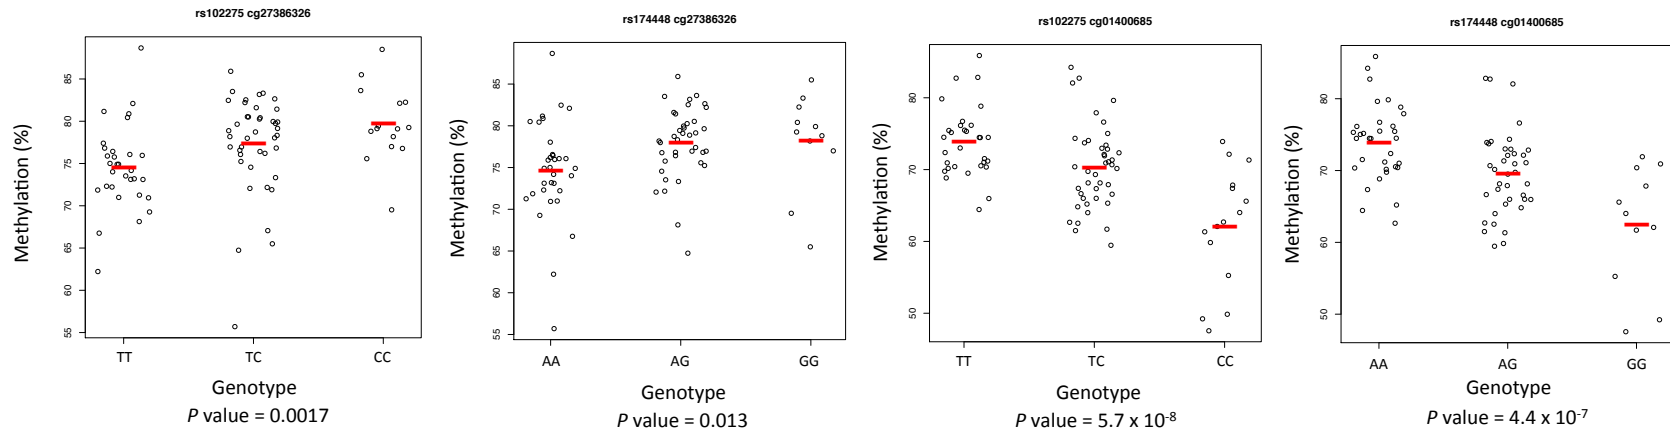**B**

GSDMA/B

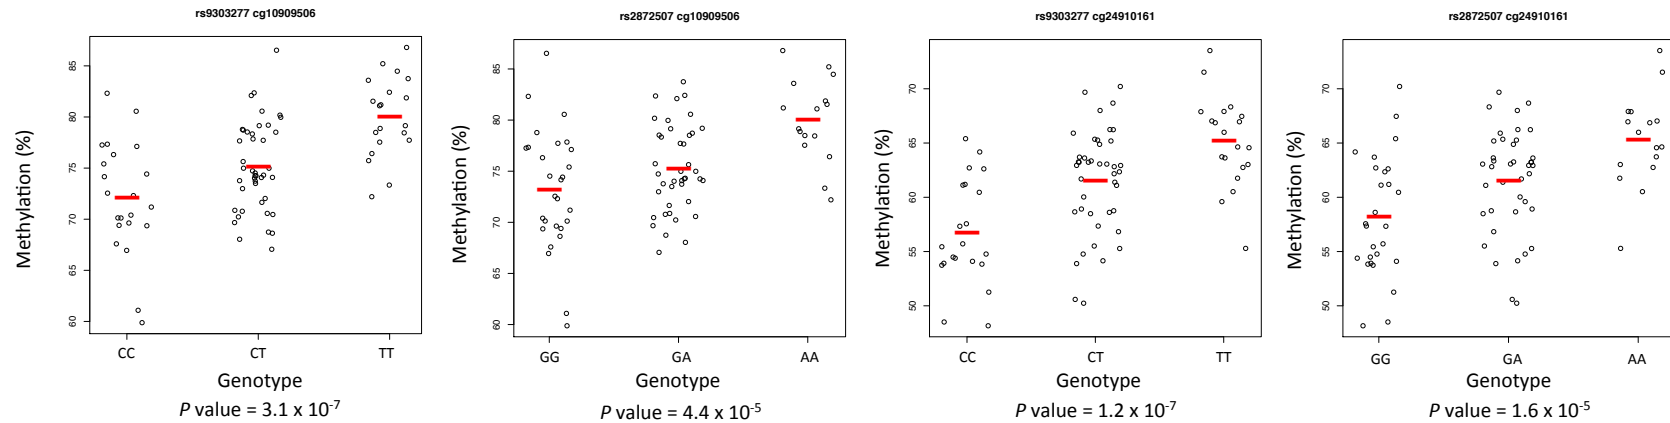

**Figure S6. Replication of genotype and methylation associations at two GeMes shown in Figures 3B and 3C using bisulfite pyrosequencing from whole blood of an independent sample set of 90 healthy individuals.**



**Table S3. Primer sequences used for bisulfite pyrosequencing and location of CpGs interrogated. Chromosomal coordinates are based on the UCSC Genome Browser Human Feb. 2009 Assembly (NCBI37/hg19).**

| <b>CpG</b> | <b>Chromosome</b> | <b>Position</b> | <b>Gene</b>    | <b>Primer</b>                                                           | <b>Sequence (5' → 3')</b>                                                                                                                                 |
|------------|-------------------|-----------------|----------------|-------------------------------------------------------------------------|-----------------------------------------------------------------------------------------------------------------------------------------------------------|
| cg27386326 | 11                | 61587980        | <i>FADS1/2</i> | Forward<br>Reverse<br>Nested forward<br>Nested reverse<br>Sequencing(F) | TTTAGGATTTAAATAGTTTATATGATATGA<br>ATTTTAATAAAAACAAAATTCACC<br>TATTTATGTTTTTTGTTTTTATG<br>/5Biosg/TAAAACCTCCTAACCTCAAATAATCC<br>GGTTAGTGTTATGTATTTTGTT     |
| cg01400685 | 11                | 61598025        | <i>FADS1/2</i> | Forward<br>Reverse<br>Nested forward<br>Nested reverse<br>Sequencing(F) | TTTGGTAATTGTTTTGATTTTTTTG<br>AATAAACCCAATAATAACATCTTTC<br>TGTTTTGGATGTTTTTAGTGTTTATTT<br>/5Biosg/CAATTCTAAATCTATTTACAACCCC<br>TTTTTTTGTTTTATAAAAATGTAAT   |
| cg10909506 | 17                | 38081995        | <i>GSDMA/B</i> | Forward<br>Reverse<br>Nested forward<br>Nested reverse<br>Sequencing(F) | GGGAATGTAGAAAAGAGTTTTAGATG<br>CTCAATTATCCAACCTAATAAACTA<br>GGAGATTGAGTTTTTAGGGGTTAGT<br>/5Biosg/AAATCCCAAAAACATCTCTTCAA<br>GATTTTAGAGAAAATGTGATTTAT       |
| cg24910161 | 17                | 38119198        | <i>GSDMA/B</i> | Forward<br>Reverse<br>Nested forward<br>Nested reverse<br>Sequencing(R) | GGTATTTGTTTGGTAGTTTTTTATTTAT<br>CTTAATCCACCCATCTTCCTATATC<br>/5Biosg/TTTTAGTTTTTAGGAGGTTAGGGTATA<br>CATCCCTTACCAAAAACAAACTACTT<br>CTACTTTATACAAAAACAAAAAC |

/5Biosg/ = 5' biotin added

F = forward R = reverse

**Table S4. Enrichment of DHSs within contiguous methylation clusters**

|            | Contiguous methylation clusters (n >=3) | Contiguous methylation clusters (n >=5) | 450K Array |
|------------|-----------------------------------------|-----------------------------------------|------------|
| DHSs       | 2,046                                   | 901                                     | 53,289     |
| All        | 8,491                                   | 3,243                                   | 417,457    |
| Enrichment | 1.89                                    | 2.17                                    |            |

**Table S5. Smoking DMPs are enriched in contiguous methylation clusters**

|                         | Smoking DMPs 450K Array |         |
|-------------------------|-------------------------|---------|
| Clusters from GSE42861  | 16                      | 8,491   |
| Clusters from GSE43414  | 17                      | 10,099  |
| Clusters from BLSA      | 14                      | 9,518   |
| Total on the 450K Array | 26                      | 417,457 |
